# Supplementary material for: Autocatalytic-assembly based on self-decomposing templates: a facile approach toward hollow metal nanostructures
Source: Royal Society of Chemistry journal article supplement (doi:10.1039/c3ra40445e), 2013-01-01
Supplement: c3ra40445e.pdf [file c3ra40445e.pdf]

## Supporting Information

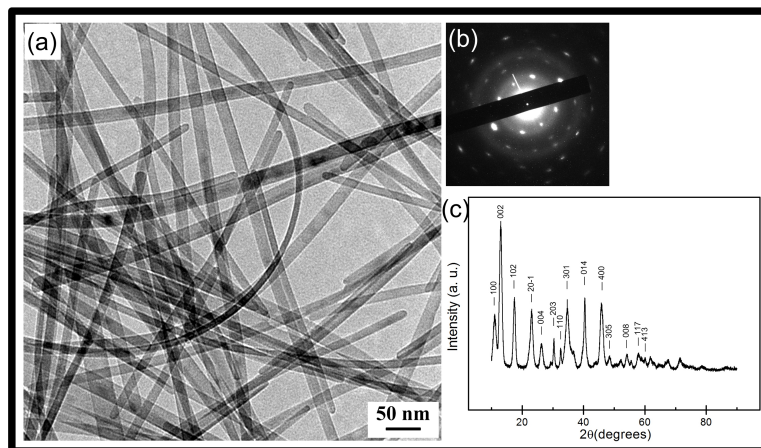

**Figure S1.** (a) large-area TEM image; (b) SAED pattern, and (c) XRD pattern of Ni(OH)<sub>2</sub> nanowire.

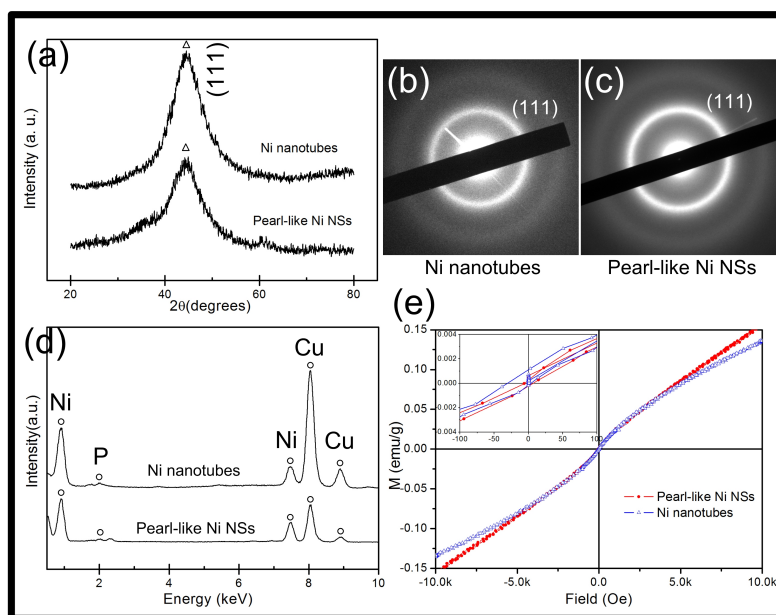

**Figure S2.** (a) XRD patterns, (b) and (c) SAED patterns, and (d) EDS patterns for Ni NTs and pearl-like Ni NSs synthesized by autocatalytic-assembled on the Ni(OH)<sub>2</sub> nanowires; (e) hysteresis loop at 300K for Ni NTs and pearl-like Ni NSs.

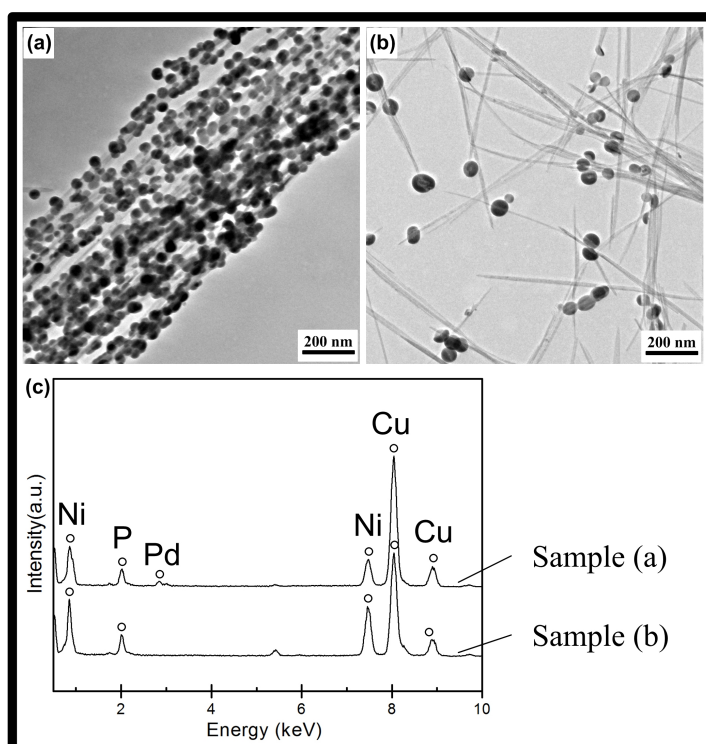

**Figure S3.** TEM image of the samples collected only after the reaction started for 5 min with different concentration of the  $\text{PdCl}_2$  solution (a) at 1.69 m mol/L and (b) at 0.62 m mol/L; (c) EDS pattern of the samples in (a) and (b).
